# Supplementary material for: MOZ directs the distal-less homeobox gene expression program during craniofacial development
Source: Oxford University Press journal article supplement (doi:10.1242/dev.175042), 2019-07-15
Supplement: dev175042supp.pdf [file dev175042supp.pdf]

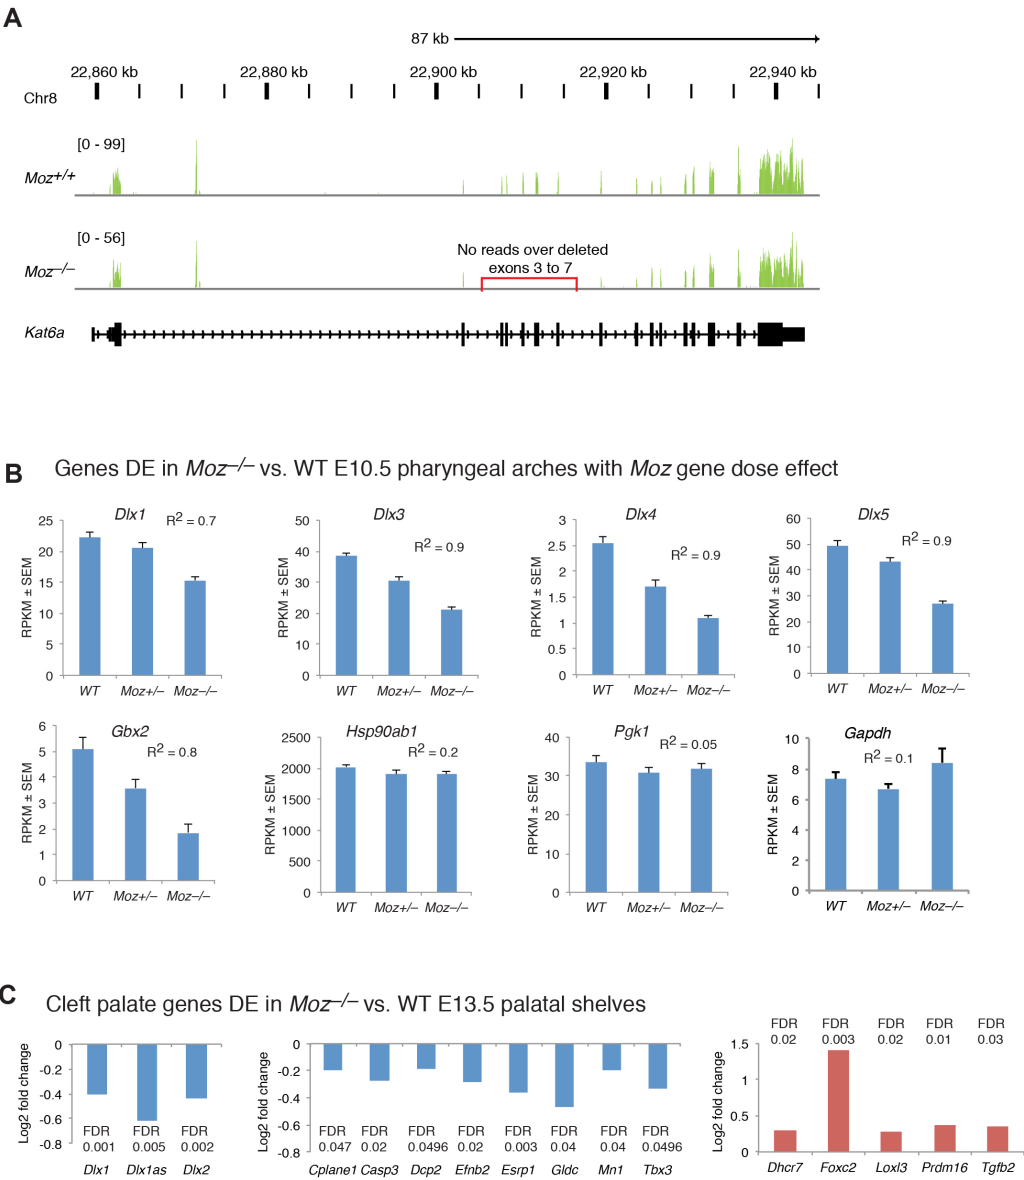

**Fig. S1. MOZ gene dosage effects on *Dlx* gene expression in E10.5 1<sup>st</sup> and 2<sup>nd</sup> pharyngeal arches and differential gene expression in E13.5 *Moz*<sup>-/-</sup> vs. wild type palatal shelves.**

(A) RNA-seq coverage plots for the *Moz* gene. Results are shown for one of the four animals of each genotype. *Moz*<sup>-/-</sup> animals lack exons 3 to 7 of the locus and so lack reads in this region.

(B) mRNA levels as reads per kilobase per million reads (RPKM) of *Dlx* genes and *Gbx2* that show a *Moz* gene dosage effect compared to the house keeping genes *Hsp90ab1*, *Pgk1* and *Gapdh*. The entire list of genes differentially expressed between E10.5 *Moz*<sup>-/-</sup> and *Moz*<sup>+/+</sup> 1<sup>st</sup> and 2<sup>nd</sup> pharyngeal arches is provided, with p values and FDRs, in **Table S1** (Excel file).

(C) Log<sub>2</sub>-fold change in mRNA levels between E13.5 *Moz*<sup>-/-</sup> and *Moz*<sup>+/+</sup> palatal shelves of *Dlx1* and *Dlx2*, as well as other genes associated with cleft palate. The entire list of genes differentially expressed between E13.5 *Moz*<sup>-/-</sup> and *Moz*<sup>+/+</sup> palatal shelves is provided, with p values and FDRs, in **Table S2**.

N = 4 E10.5 embryos for each genotype. Data were analysed as described under RNA-seq analysis.

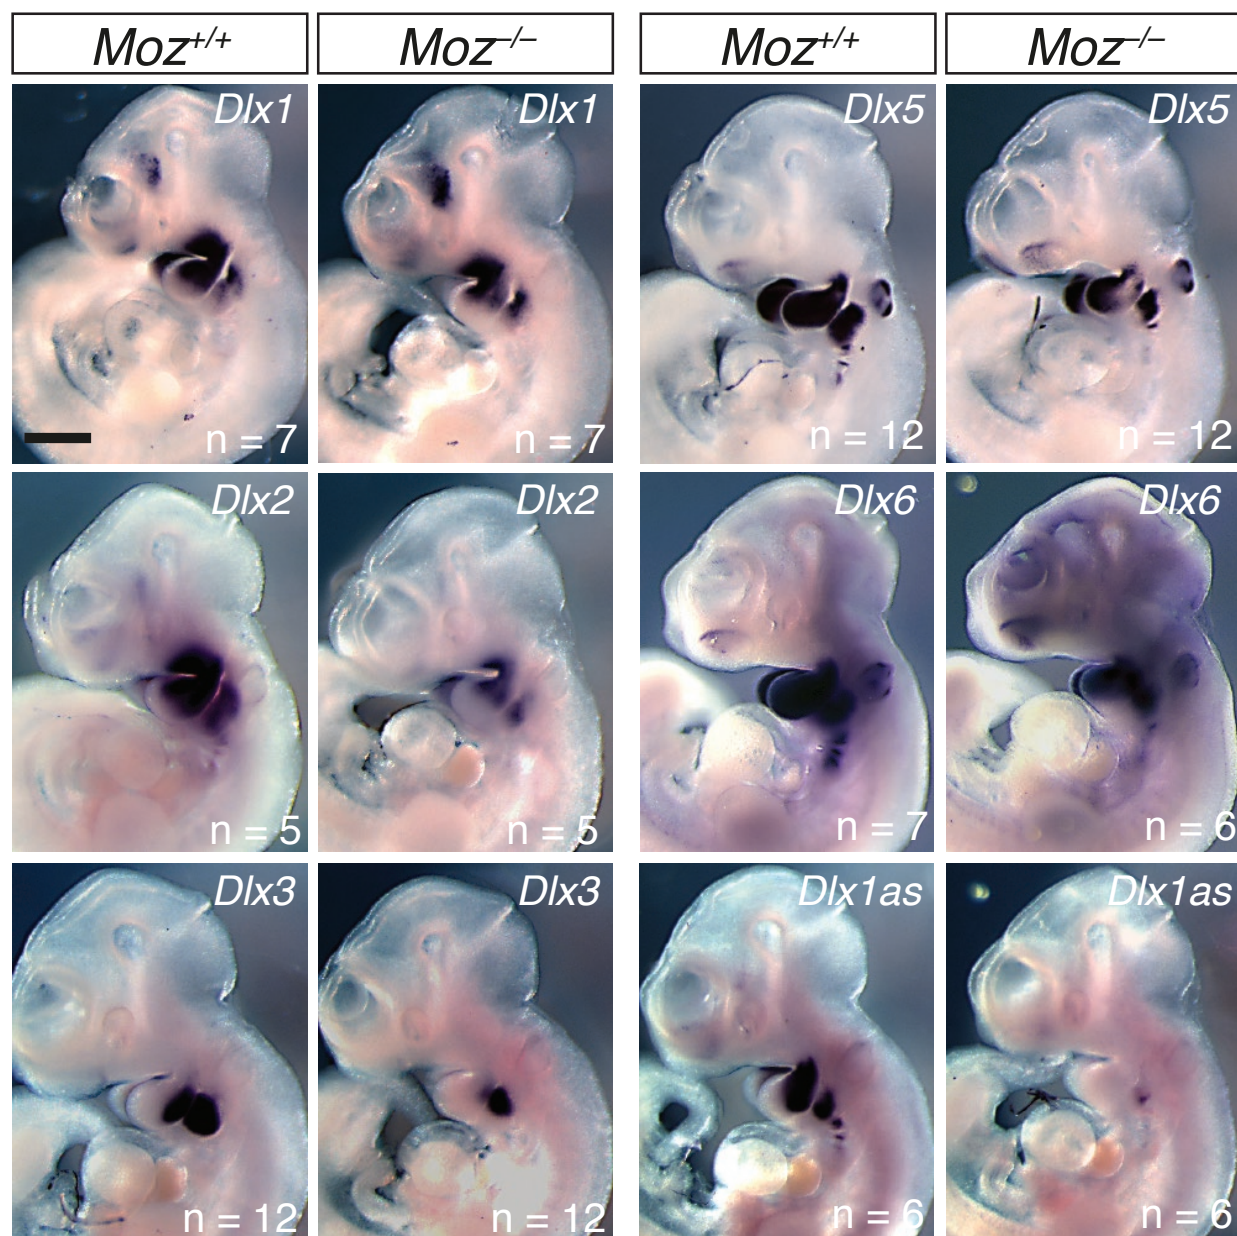

**Fig. S2. Expression domains of *Dlx* genes in *Moz*<sup>-/-</sup> embryos are reduced in size.**

Whole mount *in situ* hybridisation of E10.5 *Moz*<sup>+/+</sup> and *Moz*<sup>-/-</sup> embryos detecting *Dlx* family gene mRNA (dark purple stain). *Endpoint-staining* to reveal changes in the expression domains of the *Dlx* family genes in *Moz*<sup>-/-</sup> compared to wild type controls. Embryos are representative of each experiment. N = as indicated. Scale bar = 550  $\mu$ m.

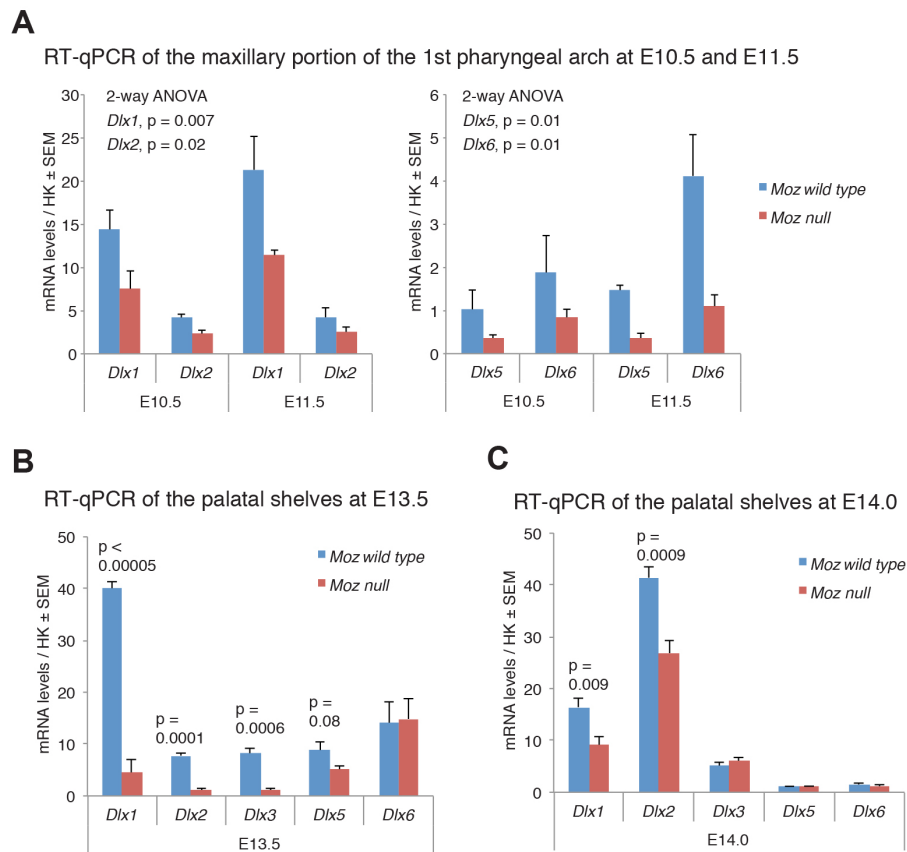

**Fig. S3. Loss of MOZ affects *Dlx* family gene expression throughout palate development.**

RT-qPCR assessment of *Dlx* gene family mRNA levels in *Moz*<sup>-/-</sup> vs. wild type isolated maxillary component of the 1<sup>st</sup> pharyngeal arch at E10.5 and E11.5, as well as in *Moz*<sup>-/-</sup> vs. wild type isolated palatal shelves at E13.5 and E14.5.

N = 4 embryos per developmental stage and genotype. Data are displayed as mean ± s.e.m. and were analysed by two-way ANOVA with *Moz* genotype and developmental stage as the two independent factors (A) or by one-way ANOVA (B,C).

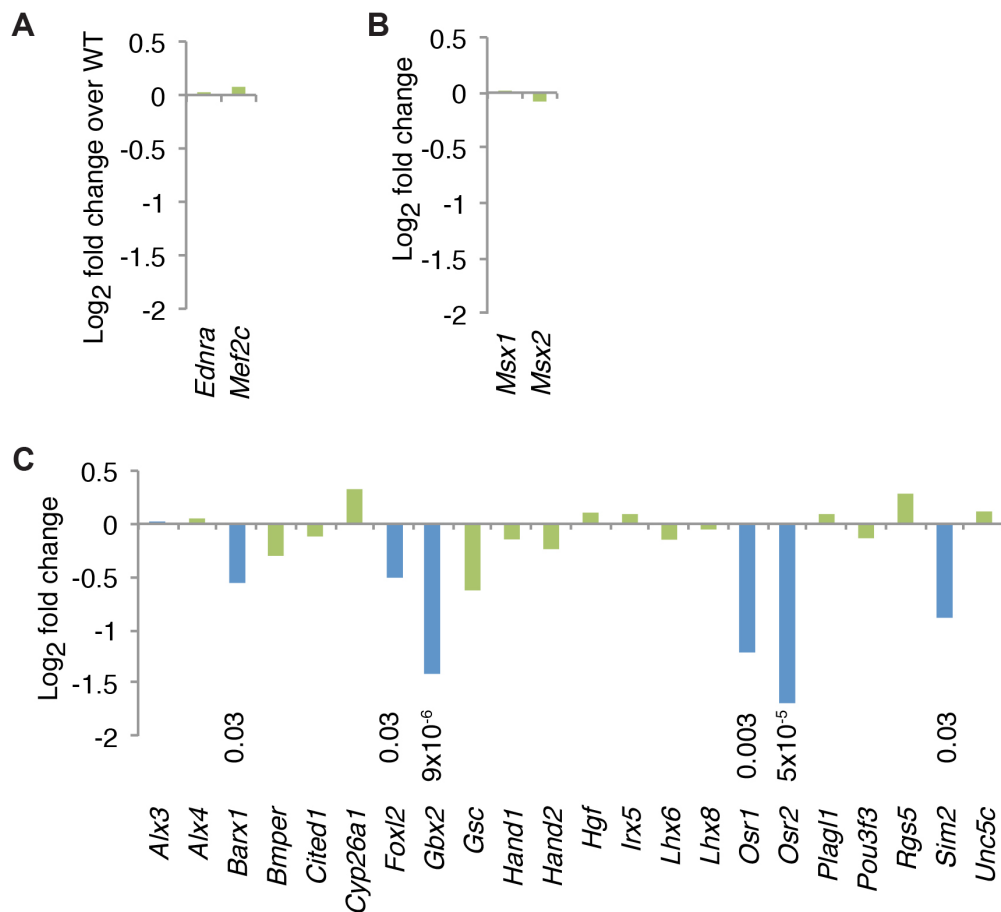

**Fig. S4. Quantitative assessment of changes in expression of DLX transcription factor target genes in *Moz*<sup>-/-</sup> vs. wild type 1<sup>st</sup> and 2<sup>nd</sup> pharyngeal arches.**

(A) mRNA levels of genes that encode upstream regulators of *Dlx* family genes are unchanged in E10.5 *Moz*<sup>-/-</sup> vs. wild type 1<sup>st</sup> and 2<sup>nd</sup> pharyngeal arches, note log<sub>2</sub>-fold change in mRNA levels is not statistically different from 0.

(B) mRNA levels of genes that encode proteins that operate at the same level as DLX proteins are unchanged in E10.5 *Moz*<sup>-/-</sup> vs. wild type 1<sup>st</sup> and 2<sup>nd</sup> pharyngeal arches, note log<sub>2</sub>-fold change in mRNA levels is not statistically different from 0.

(C) Log<sub>2</sub>-fold change in mRNA levels of genes that encode downstream target genes of DLX family transcription factors differentially expressed in E10.5 *Moz*<sup>-/-</sup> vs. wild type 1<sup>st</sup> and 2<sup>nd</sup> pharyngeal arches.

P values and FDRs are provided in **Table S1**.

N = 4 E10.5 embryos for each genotype. Data were analysed as described under RNA-seq analysis.



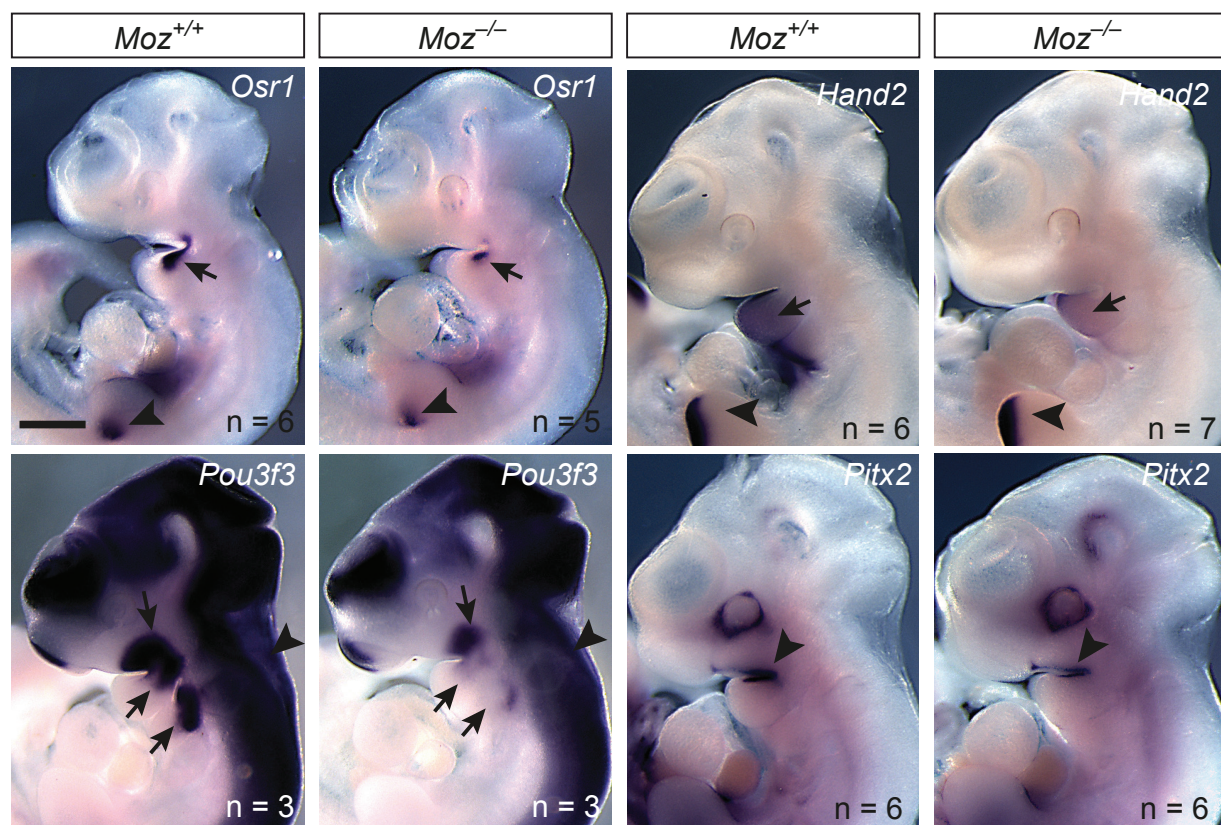

**Fig. S5. Genes downstream of DLX transcription factors are affected by loss of MOZ.**

Whole mount *in situ* hybridisation on E10.5 *Moz*<sup>+/+</sup> and *Moz*<sup>-/-</sup> embryos probed for genes downstream of DLX transcription factors (*Osr1*, *Pou3f3*, *Hand2*) and upstream of *Dlx* gene expression (*Pitx2*). Arrows indicate pharyngeal arch expression domains that are affected by the loss of MOZ. Arrowheads indicate expression domains outside the pharyngeal arches (*Osr1*, *Hand2*, *Pou3f3*) or the unaffected pharyngeal arch domain of *Pitx2*. Embryos are representative of each experiment. Endpoint staining. N, number of embryos as indicated. Scale bar = 550  $\mu$ m.

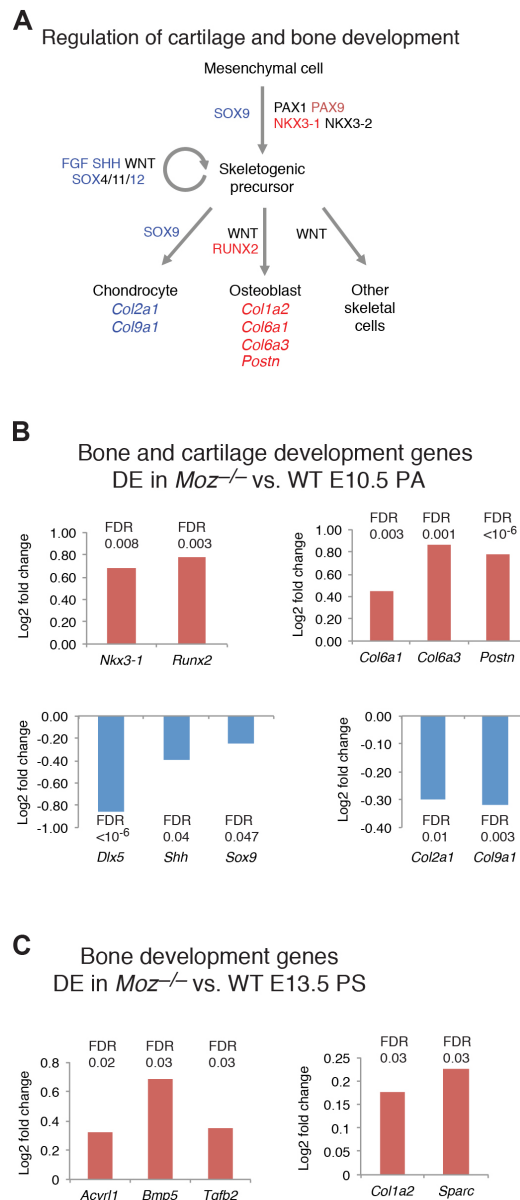

**Fig. S6. MOZ affects the expression of genes encoding regulators and effectors of bone development.**

(A) Schematic drawing of the skeletogenic cell lineage based on publications reviewed in (Hartmann, 2009; Lefebvre and Bhattaram, 2010). Genes upregulated in *Moz*<sup>-/-</sup> vs. wild type are indicated in red font, downregulated in blue font. One member of the WNT family that has been shown to increase palatal mesenchymal cell proliferation is WNT6 (Jiang et al., 2017).

(B) Log<sub>2</sub>-fold change in mRNA levels of genes differentially expressed in E10.5 *Moz*<sup>-/-</sup> vs. wild type 1<sup>st</sup> and 2<sup>nd</sup> pharyngeal arches.

(C) Log<sub>2</sub>-fold change in mRNA levels of genes differentially expressed in E13.5 *Moz*<sup>-/-</sup> vs. wild type palatal shelves.

P values and FDRs are provided in **Tables S1,S2**.

N = 4 embryos per genotype and developmental stage. Data were analysed as described under RNA-seq analysis.



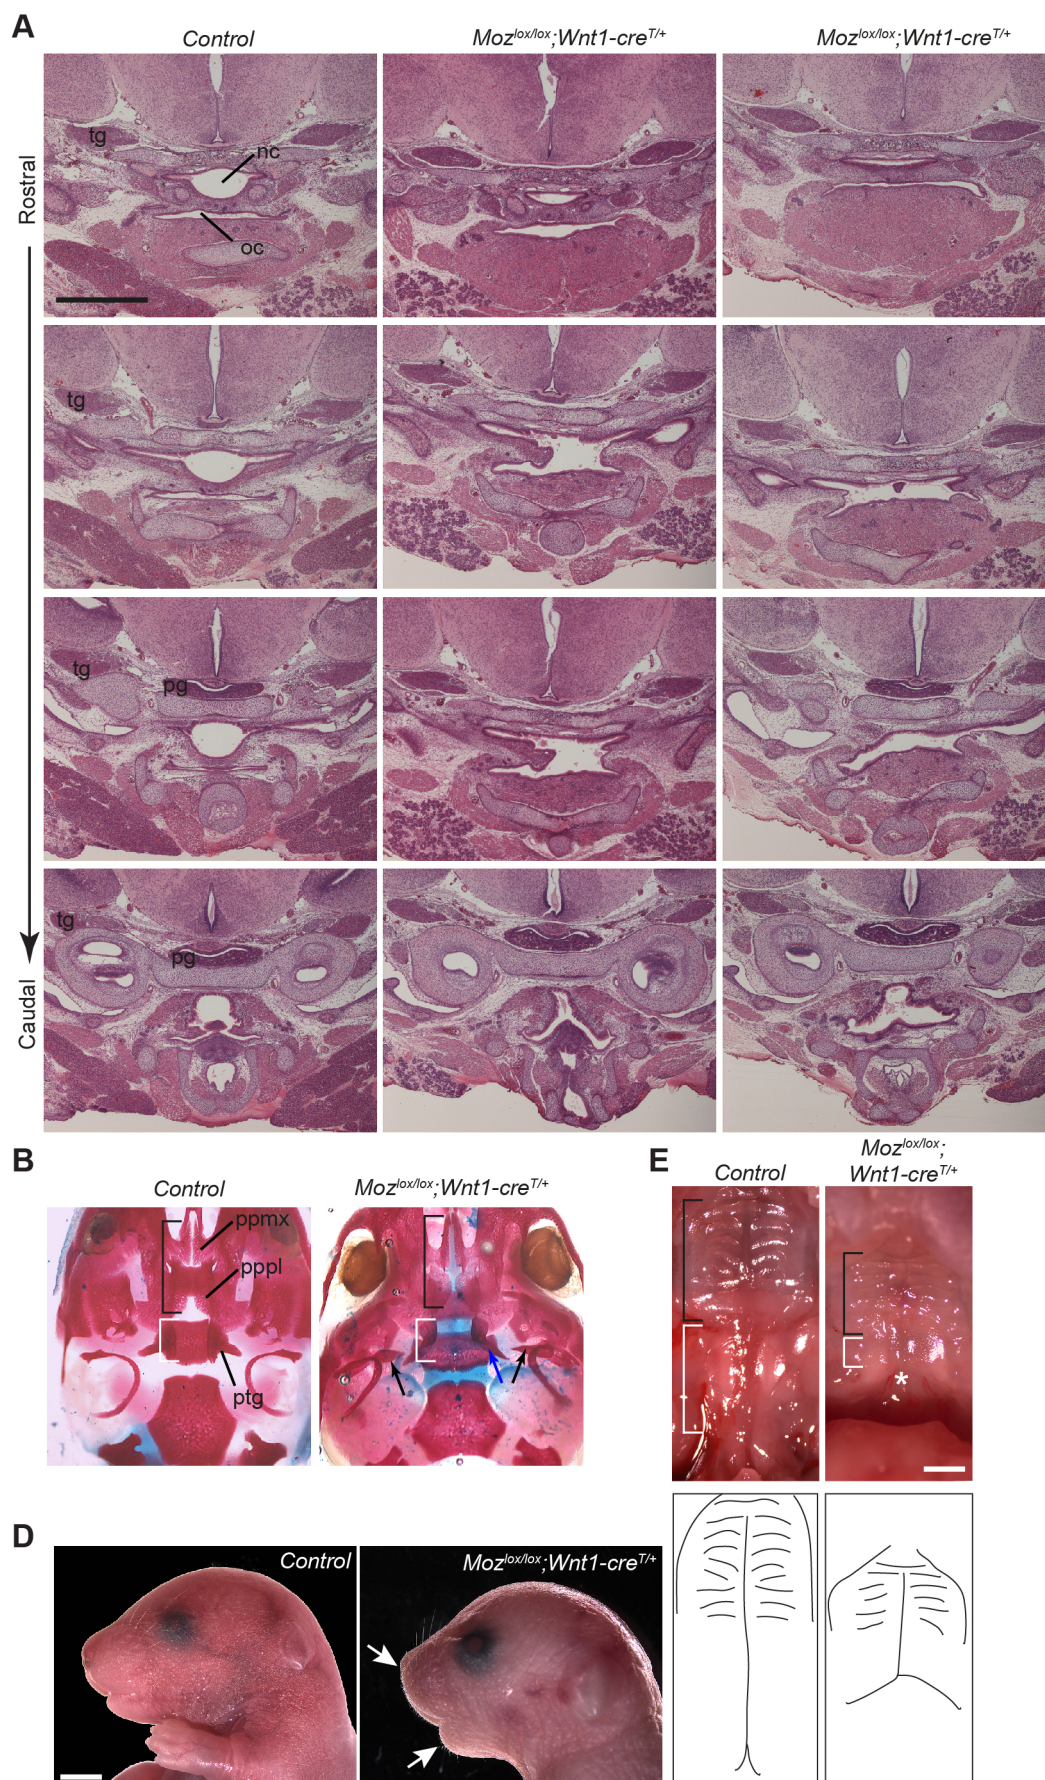

**Fig. S7. Serial sections, skeletal preparations and gross morphology of *Moz<sup>lox/lox</sup>;Wnt1-cre<sup>T/+</sup>* mice.**

(A) Serial frontal H&E stained sections of the E18.5 heads of two *Moz<sup>lox/lox</sup>;Wnt1-cre<sup>T/+</sup>* pups and

one control pup at four rostro-caudal levels spanning the anatomical location of the soft palate from the most rostral level that still displayed an intact palate in the *Moz<sup>lox/lox</sup>;Wnt1-cre<sup>T/+</sup>* pups to the first section displaying parts of the pharynx. Note the disrupted barrier between the oral cavity (oc) and the nasal cavity (nc). The physical distance between the levels was comparable between controls and *Moz<sup>lox/lox</sup>;Wnt1-cre<sup>T/+</sup>* pups. The trigeminal ganglion (tg) and the pituitary gland (pt) are indicated as landmarks.

(B) Ventral view of the skull, lower jaw removed. Note the relatively normal ratios of the structure contributing to the hard palate (black brackets) vs. the anatomical location of the soft palate (white brackets). The extents of palatine process of the palatine (pppl) and the maxillary bone (ppmx) appear similar in the *Moz<sup>lox/lox</sup>;Wnt1-cre<sup>T/+</sup>* and the control. In contrast, the pterygoid bone (ptg) is malformed in the *Moz<sup>lox/lox</sup>;Wnt1-cre<sup>T/+</sup>* skull (blue arrow). Note the abnormal additional bone (black arrows), which, like the os paradoxicum in *Dlx5<sup>-/-</sup>* skulls, is positioned caudal of alisphenoid bone [compare to Fig. 6T,6T’].

(D) External appearance of the head at birth. Most *Moz<sup>lox/lox</sup>;Wnt1-cre<sup>T/+</sup>* pups had a normal external appearance, including apparently normal jaws. One atypical *Moz<sup>lox/lox</sup>;Wnt1-cre<sup>T/+</sup>* pup showed shortening of the upper and lower jaw. This most severely affected *Moz<sup>lox/lox</sup>;Wnt1-cre<sup>T/+</sup>* pup is displayed here. Arrows indicate shortened upper and lower jaw.

(E) Top two panels: ventral view of the palate of the pups shown in (D). Black bracket indicates region of the hard palate, white bracket region of the soft palate, asterisks cleft of the soft palate. Right two panels: line drawing of left panels to indicate structural differences

N = 6 animals per genotype examined. Scale bars equal 1 mm (A), 860  $\mu$ m (B), 2 mm (D) and 1 mm (E)



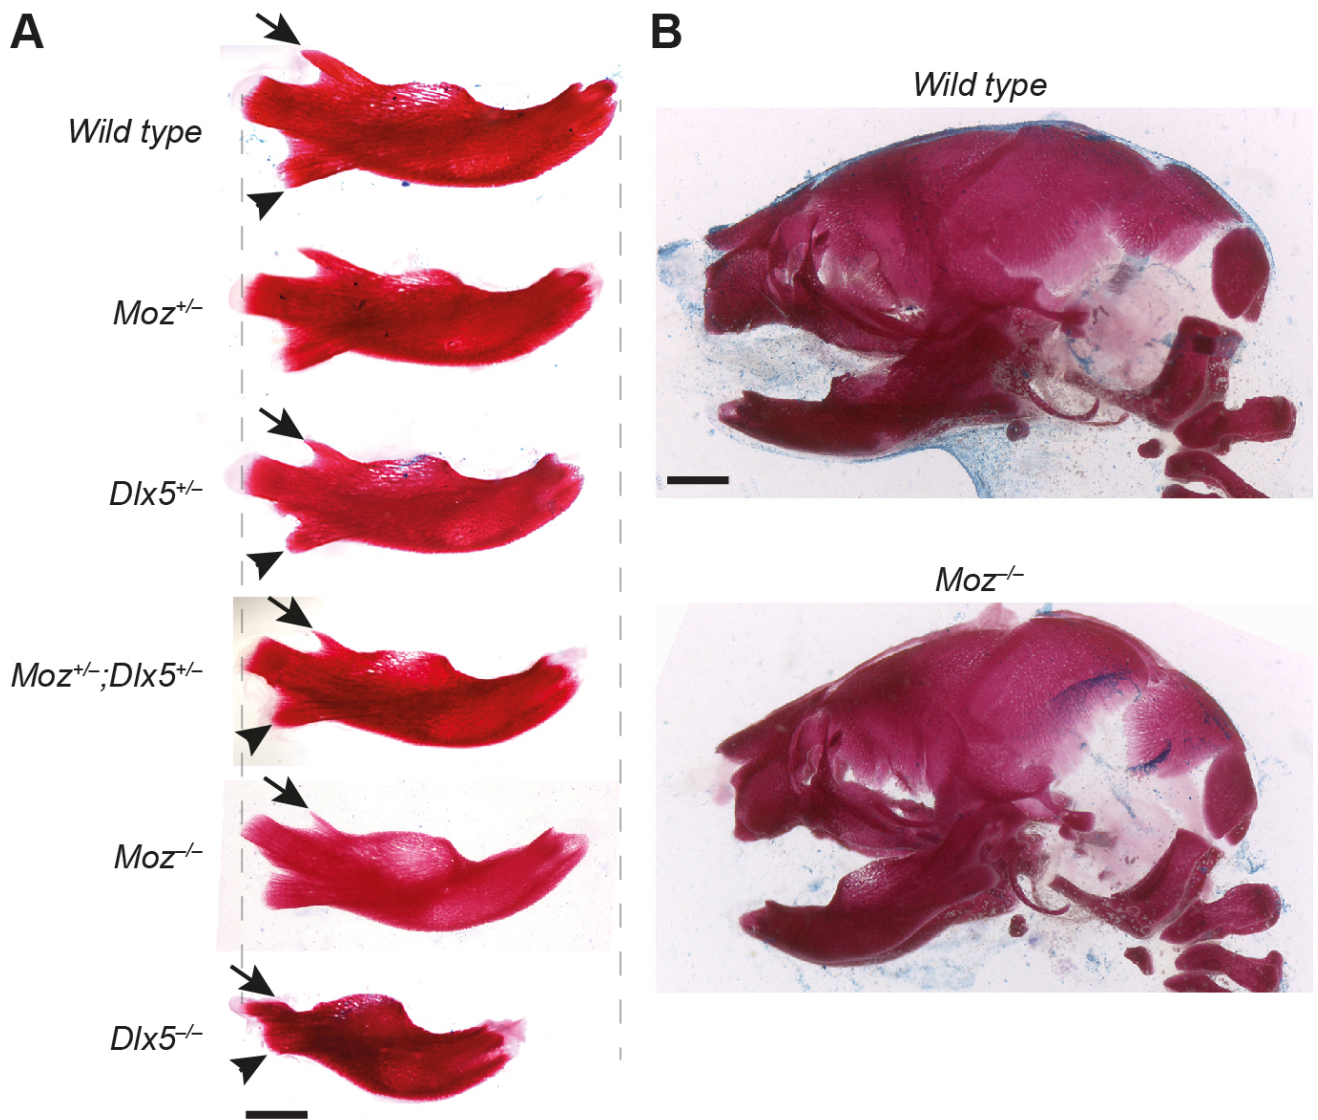

**Fig. S8. *Moz*;*Dlx5* double heterozygous animals have a shortened lower jaw.**

(A) Alizarin red staining of the lower jaw bone of E18.5 wild type, single *Moz* or *Dlx5* heterozygotes, *Moz*;*Dlx5* double heterozygotes, *Moz* homozygous and *Dlx5* homozygous mutant foetuses revealed progressively shorter jaw in the single heterozygotes, double heterozygotes and homozygote animals compared to wild type controls. The coronoid process (arrow) was also progressively reduced. In contrast, the angular process (arrowhead) appeared to be more influenced by the loss of one or two alleles of *Dlx5* than by loss of *Moz* alleles. Scale bar = 820  $\mu$ m.

(B) Lateral view of E18.5 wild type and *Moz* homozygous skulls with lower jaw attached. Scale bar = 640  $\mu$ m.



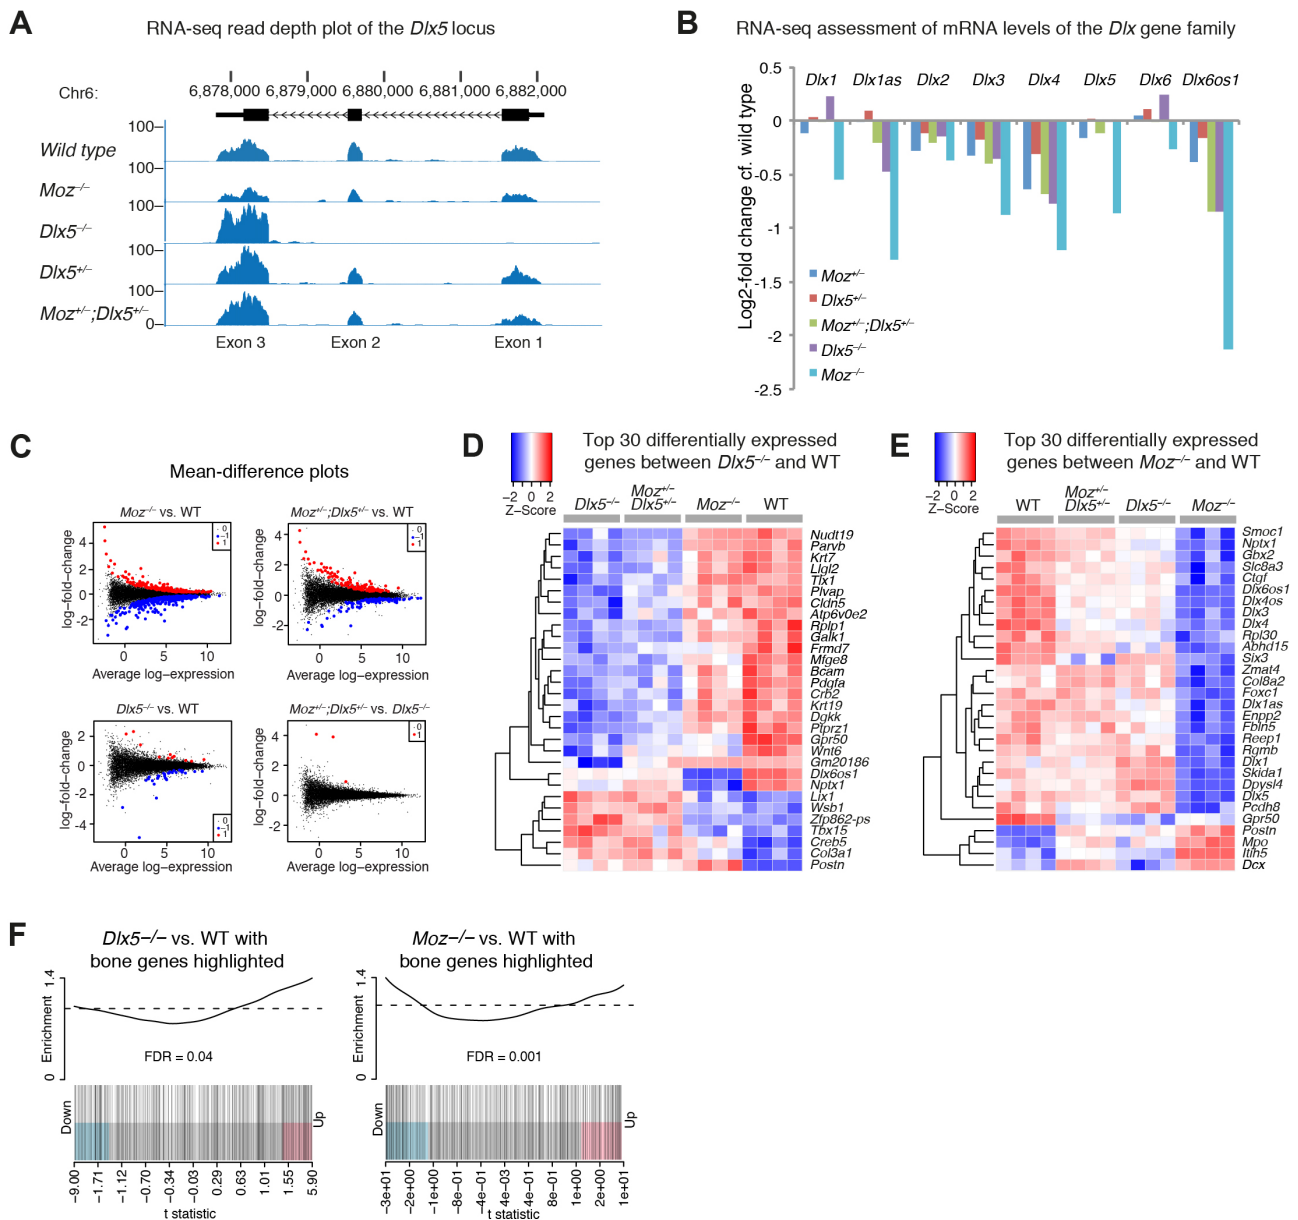

**Fig. S9. *Moz*;*Dlx5* mutant pharyngeal arch transcriptome analysis.**

RNA sequencing experiments comparing E10.5 1<sup>st</sup> and 2<sup>nd</sup> pharyngeal arches of wild type, *Moz*<sup>+/-</sup>, *Dlx5*<sup>+/-</sup>, *Moz*<sup>+/-</sup>;*Dlx5*<sup>+/-</sup> double heterozygotes, *Dlx5*<sup>-/-</sup> and *Moz*<sup>-/-</sup> embryos.

(A) RNA-seq coverage plots for the *Dlx5* gene. Results are shown for one of the four animals for each genotype. *Dlx5*<sup>-/-</sup> animals lack exons 1 and 2 of the locus, but have increased reads in exon 3 when compared to wild type. *Moz*<sup>-/-</sup> have a reduced number of reads on all *Dlx5* exons compared to wild type, and *Moz*<sup>+/-</sup>;*Dlx5*<sup>+/-</sup> double heterozygotes display levels intermediate between *Moz*<sup>-/-</sup> and wild type samples in exons 1 and 2.

(B) Log<sub>2</sub> fold changes in *Dlx* family gene expression in each genotype relative to wild type controls. Positive log fold changes show upregulation in the mutant; negative values indicate downregulation. FDRs are displayed in **Table S3**.

(C) Mean difference plots reveal many genes differentially expressed between  $Moz^{-/-}$  and wild type pharyngeal arches and few differences between  $Dlx5^{-/-}$  and wild type samples. Although  $Moz^{+/-};Dlx5^{+/-}$  double heterozygotes display many differences to wild type, they are similar to  $Dlx5^{-/-}$  pharyngeal arches. Y-axes show  $\log_2$  fold changes in expression levels. X-axis shows average  $\log_2$ -expression ( $\log_2$  counts per million).

(D) Heatmap of the top 30 genes differentially expressed between  $Dlx5^{-/-}$  and wild type pharyngeal arches. Genes are grouped by hierarchical clustering. Similar to **Figure 7E**, this comparison indicates similarities between the  $Moz^{+/-};Dlx5^{+/-}$  double heterozygotes and  $Dlx5^{-/-}$  samples.

(E) Heatmap of the top 30 genes differentially expressed between  $Moz^{-/-}$  and wild type pharyngeal arches. Genes are grouped by hierarchical clustering and show that, while  $Moz^{-/-}$  samples are dissimilar to other the genotypes, many gene expression changes in the  $Moz$  and  $Dlx5$  genotypes have the same direction.

(F) Barcode plots showing up or down regulation of bone development genes in various genotypes relative to wild type.  $Moz^{-/-}$  display a mixed response for bone genes, whereas bone genes are enriched among the genes upregulated in  $Dlx5^{-/-}$  compared to wild type, as they are in  $Moz^{+/-};Dlx5^{+/-}$  compared with wild type (see **Figure 7H**).

All data shown are from N = 4 female E10.5 embryos for each of the 6 genotypes.

**Table S1** supplied in Excel file displays RNA-seq results of genes differentially expressed in E10.5 *Moz*<sup>-/-</sup> vs. wild type 1<sup>st</sup> and 2<sup>nd</sup> pharyngeal arches.

**Table S2** supplied in Excel file displays RNA-seq results of genes differentially expressed in E13.5 *Moz*<sup>-/-</sup> vs. wild type palatal shelves.

**Table S3** supplied in Excel file displays the comparison of craniofacial skeletal anomalies between genotypes *Moz*<sup>lox/lox</sup>; *Wnt1-cre*<sup>T/+</sup>, *Moz*<sup>+/-</sup> single heterozygotes, *Dlx5*<sup>+/-</sup> single heterozygotes, *Moz*<sup>+/-</sup>; *Dlx5*<sup>+/-</sup> compound heterozygotes, *Dlx5*<sup>-/-</sup> single knockout and *Moz*<sup>-/-</sup> single knockout mouse data from this study and data from the literature on *Dlx1*<sup>+/-</sup>; *Dlx2*<sup>+/-</sup>; *Dlx3*<sup>+/-</sup>; *Dlx5*<sup>+/-</sup>; *Dlx6*<sup>+/-</sup> compound heterozygotes, *Dlx5*<sup>-/-</sup> single knockout, *Dlx2*<sup>-/-</sup> single knockout and *Dlx1*<sup>-/-</sup> single knockout mice.

[Click here to Download Tables S1 - S3](#)

**Table S4:** FDRs for difference between *Moz* and/or *Dlx5* mutants vs. wild-type controls (WT) for selected differentially expressed genes

| Gene                                                            | Direction of change | All <i>Moz</i> and <i>Dlx5</i> genotypes vs. WT* | Cleft palate genotypes vs. WT* | <i>Moz</i> <sup>-/-</sup> vs. WT | <i>Dlx5</i> <sup>-/-</sup> vs. WT |
|-----------------------------------------------------------------|---------------------|--------------------------------------------------|--------------------------------|----------------------------------|-----------------------------------|
| Upstream regulators of <i>Dlx</i> genes                         |                     |                                                  |                                |                                  |                                   |
| <i>Ednra</i>                                                    | ↑                   | 0.047                                            | 0.09                           | 1                                | 0.1                               |
| <i>Fgf8</i>                                                     | ±0                  | 0.06                                             | 0.06                           | 0.2                              | 0.2                               |
| <i>Pitx2</i>                                                    | ±0                  | 0.6                                              | 0.7                            | 0.8                              | 0.4                               |
| <i>Mef2c</i>                                                    | ±0                  | 0.5                                              | 0.5                            | 0.7                              | 0.7                               |
| <i>Dlx</i> gene family                                          |                     |                                                  |                                |                                  |                                   |
| <i>Dlx1</i>                                                     | ↓                   | 0.5                                              | 0.4                            | 8x10 <sup>-6</sup>               | 0.4                               |
| <i>Dlx1as</i>                                                   | ↓                   | 0.04                                             | 0.002                          | 6x10 <sup>-8</sup>               | 0.2                               |
| <i>Dlx2</i>                                                     | ↓                   | 0.1                                              | 0.2                            | 0.02                             | 0.7                               |
| <i>Dlx3</i>                                                     | ↓                   | 0.0004                                           | 4x10 <sup>-5</sup>             | 2x10 <sup>-9</sup>               | 0.1                               |
| <i>Dlx4</i>                                                     | ↓                   | 0.003                                            | 0.0008                         | 8x10 <sup>-6</sup>               | 0.1                               |
| <i>Dlx5</i>                                                     | ↓                   | 0.04                                             | 0.008                          | 2x10 <sup>-9</sup>               | 1                                 |
| <i>Dlx6</i>                                                     | ±0                  | 0.9                                              | 1                              | 0.07                             | 0.5                               |
| <i>Dlx6os1</i>                                                  | ↓                   | 4x10 <sup>-10</sup>                              | 3x10 <sup>-13</sup>            | 9x10 <sup>-18</sup>              | 3x10 <sup>-5</sup>                |
| Confirmed direct target of DLX transcription factors            |                     |                                                  |                                |                                  |                                   |
| <i>Gbx2</i>                                                     | ↓                   | 0.03                                             | 0.008                          | 9x10 <sup>-6</sup>               | 0.3                               |
| Inducers of self-renewal of bipotential skeletogenic precursors |                     |                                                  |                                |                                  |                                   |
| <i>Shh</i>                                                      | ↓                   | 0.08                                             | 0.05                           | 0.04                             | 0.2                               |
| <i>Wnt6</i>                                                     | ↓                   | 0.01                                             | 0.008                          | 0.02                             | 0.02                              |
| Bone development inducing genes                                 |                     |                                                  |                                |                                  |                                   |
| <i>Pax9</i>                                                     | ↑                   | 0.009                                            | 0.009                          | 0.1                              | 0.2                               |
| <i>Runx2</i>                                                    | ↑                   | 0.0004                                           | 0.0008                         | 0.003                            | 0.06                              |
| Genes encoding proteinaceous extracellular matrix               |                     |                                                  |                                |                                  |                                   |
| <i>Colla2</i>                                                   | ↑                   | 0.02                                             | 0.01                           | 0.7                              | 0.05                              |
| <i>Col6a3</i>                                                   | ↑                   | 0.02                                             | 0.01                           | 0.04                             | 0.2                               |
| <i>Postn</i>                                                    | ↑                   | 6x10 <sup>-5</sup>                               | 4x10 <sup>-6</sup>             | 2x10 <sup>-8</sup>               | 0.01                              |

\* All *Moz* and *Dlx5* genotypes: *Moz*<sup>+/-</sup>, *Dlx5*<sup>+/-</sup>, *Moz*<sup>+/-</sup>;*Dlx5*<sup>+/-</sup>, *Moz*<sup>-/-</sup>, *Dlx5*<sup>-/-</sup> vs. *WT*

Cleft palate genotypes: *Moz*<sup>+/-</sup>;*Dlx5*<sup>+/-</sup>, *Moz*<sup>-/-</sup>, *Dlx5*<sup>-/-</sup>.

DLX target genes are based on (Barron et al., 2011; Jeong et al., 2008). Upstream regulators of *Dlx* genes are based on (Charite et al., 2001; Green et al., 2001; Thomas et al., 2000; Verzi et al., 2007). Skeletogenic cell lineage are based on publications reviewed in (Hartmann, 2009; Lefebvre and Bhattaram, 2010).

**Table S5** supplied in Excel file displays RNA-seq results of genes differentially expressed in the 1<sup>st</sup> and 2<sup>nd</sup> pharyngeal arches of E10.5 wild type, *Moz*<sup>+/-</sup>, *Dlx5*<sup>+/-</sup>, *Moz*<sup>+/-</sup>;*Dlx5*<sup>+/-</sup> double heterozygotes, *Dlx5*<sup>-/-</sup> and *Moz*<sup>-/-</sup> embryos.

[Click here to Download Table S5](#)

**Table S6:** Whole mount in situ hybridisation sense and antisense probe templates

| Target gene   | Generated by primer sequences (5' to 3')                      | Length  | Accession number    |
|---------------|---------------------------------------------------------------|---------|---------------------|
| <i>Dlx1</i>   | Fwd: TCGGGCTGAAAGGTCGCTGAGTC<br>Rev: CACCCAGACCCCGCGAGAAGAGAT | 1029 bp | NCBI: NM_010053.2   |
| <i>Dlx2</i>   | IMAGE clone obtained from RZPD                                | 2192 bp | GenBank: BC094317.1 |
| <i>Dlx3</i>   | Fwd: GGCCACCGATTCTGACTACTA<br>Rev: CATCAGGGGGCAGAAGAAAGTTAGC  | 1307 bp | NCBI: NM_010055     |
| <i>Dlx5</i>   | Fwd: GGCCACCGATTCTGACTACTA<br>Rev: AAAAAGGGGGCGGGGCTCTC       | 931 bp  | NCBI: NM_010056.3   |
| <i>Dlx6</i>   | Fwd: CCCCCAAAGTTTGTATGATG<br>Rev: AGAAACGTCCCACACTGGAG        | 799 bp  | UCSC: uc009aww.1    |
| <i>Dlx1as</i> | Fwd: GAAGACCTCATGCAGCACAA<br>Rev: GACCTTCGCAGTCTTTCAGG        | 1145 bp | RefSeq: NR_002854.2 |
| <i>Pitx2</i>  |                                                               | 900 bp  | NCBI: NM_011098     |
| <i>Gsc</i>    | Fwd: GCATGTTTCAGCATCGACAAC<br>Rev: CAGTCCTGGGCCTGTACATT       | 909 bp  | UCSC: uc007oxh.1    |
| <i>Gbx2</i>   | Fwd: GAGTCAAAGGTGGAAGATGACC<br>Rev: CAAACGAGCAGAGCAGAGTTTC    | 995 bp  | UCSC: uc007bzb.1    |
| <i>Hand2</i>  | Fwd: CGAGGAGAACCCCTACTTCC<br>Rev: GATAACCGACCCGACAGAAA        | 1039 bp | UCSC: uc009lss.2    |
| <i>Sim2</i>   | Fwd: TGCAGCGGCTACCTAAAGAT<br>Rev: GCTGGGCACTAGAGAGTTGG        | 948 bp  | UCSC: uc008aae.1    |
| <i>Osr1</i>   | Fwd: GCTGTCCACAAGACGCTACA<br>Rev: TCAGCATAAAGTGCCAGTCG        | 856 bp  | UCSC: ux007nao.2    |
| <i>Osr2</i>   | Fwd: TCTTTACACATCCCGCTTCC<br>Rev: TCCTTTCCCACACTCCTGAC        | 1023 bp | UCSC: uc007vma.1    |
| <i>Pou3f3</i> | Fwd: CAGCCTACAGCTGGAAAAGG<br>Rev: TTTACTGCGGAGGATGCTTT        | 1084 bp | UCSC: uc007auw.1    |



**Table S7:** Oligonucleotide primers for RT-qPCR and for ChIP-qPCR**RT-qPCR primers**

| Target Gene     | Primer sequences (5' to 3')                             | Description of amplicon | Accession number     |
|-----------------|---------------------------------------------------------|-------------------------|----------------------|
| <i>Dlx1</i>     | Fwd: TCCAGCCCCTACATCAGTTC<br>Rev: TCTTTTCCCTTTGCCGTTA   | Exons 2-3               | UCSC: uc008kau.1     |
| <i>Dlx2</i>     | Fwd: CTTCTGCATCCTTCGCAGAC<br>Rev: CAAGTCTCAGACGCTGTCCA  | Exons 4-5               | UCSC: uc008kax.2     |
| <i>Dlx3</i>     | Fwd: TAACCCTGGGGCTGTGTACT<br>Rev: CTAGGACAGGGCACCTTCTG  | Exons 4-5               | UCSC: uc007kzy.2     |
| <i>Dlx4</i>     | Fwd: GTCTACCCAAGGCAGACACC<br>Rev: TGACAGGAGGGCTGAAGTCT  | Within exon 3           | UCSC: uc007kzz.2     |
| <i>Dlx5</i>     | Fwd: AGCCCCTACCACCAGTACG<br>Rev: CAGGGCGAGGTAAGTGTCT    | Exons 1-2               | UCSC: uc009awz.1     |
| <i>Dlx6</i>     | Fwd: ATTCCTCACCACACAGGAC<br>Rev: CTGCCATGTTTGTGCAGATT   | Exons 4-6               | UCSC: uc009aww.1     |
| <i>Dlx1as</i>   | Fwd: GCCTTCGACCCTTTTGATTT<br>Rev: TCCTGGACCACTTTTCCTG   | Exons 1-2               | RefSeq: NR_002854.2  |
| <i>Dlx6os1</i>  | Fwd: AGGGAACGGGGATATTGAAC<br>Rev: ACTCCACAGCAGTGGGAAAG  | Exons 1-2               | UCSC: uc009awu.1     |
| <i>Hsp90ab1</i> | Fwd: AGAATCCGACACCAAACTGC<br>Rev: ACCTGGGAACCATGCTAAG   | Exon 10                 | NCBI: NM_008302      |
| <i>Pgk1</i>     | Fwd: TACCTGCTGGCTGGATGG<br>Rev: CACAGCCTCGGCATATTTCT    | Exons 8-9               | NCBI: NM_008828      |
| <i>Gapdh</i>    | Fwd: TTCACCACCATGGAGAAGGC<br>Rev: CCCTTTTGCTCCACCCT     | Exons 3-4               | NCBI: NM_001289726.1 |
| <i>Psmb2</i>    | Fwd: GAGGGCAGTGGAGCTTCTTA<br>Rev: AGGTGGGCAGATTCAAGATG  | Exons 5-6               | NCBI: NM_011970.4    |
| <i>Rpl13a</i>   | Fwd: GGAGAAACGGAAGGAAAAGG<br>Rev: TGAGGACCTCTGTGAAGTTGC | Exons 7-8               | NCBI: NM_009438      |

\*Primers were designed to be intron-spanning and towards the 3' end (close to the poly-A site) where possible.

**ChIP-qPCR primers**

| Name of primer set | Primer sequences (5' to 3')                              | Location relative to TSS or chr. position | Description of amplicon position                                                          |
|--------------------|----------------------------------------------------------|-------------------------------------------|-------------------------------------------------------------------------------------------|
| <i>Hsp90ab1</i>    | Fwd: AATTGACATCATCCCCAACC<br>Rev: TCGTGCCAGACTTAGCAATG   | +360 bp                                   | Within <i>Hsp90ab1</i> exon 3                                                             |
| <i>Dlx5_5'</i>     | Fwd: TGACAGAGGCTTGGAGTCCT<br>Rev: TCCTCTTCTGGTTCCCTTT    | -1447 bp                                  | Within intergenic region (IR), 5' of <i>Dlx5</i> promoter                                 |
| <i>Dlx5_1</i>      | Fwd: AGGTTTAATCGGGTGTTTTGC<br>Rev: CCAAATCCCTTAGCCTCTTTG | +732 bp                                   | Between <i>Dlx5</i> exons 1 & 2                                                           |
| <i>Dlx5_2</i>      | FWD: ACCTCTGAGTGTCCCGGTAA<br>REV: CCCCCTTTTTCATGATCTTC   | +3536 bp                                  | Overlap 5' intron-exon boundary of <i>Dlx5</i> exon 3                                     |
| <i>ei enhancer</i> | FWD: GTCAGAGCCCAAACCTTGAA<br>REV: TCTCCTCTCAGACTCTCCAAGC | +0 bp ( <i>Dlx6os1</i> )                  | Within ei enhancer sequence - overlaps TSS of <i>Dlx6os1</i>                              |
| <i>Dlx5_11</i>     | Fwd: CAATTGAAGCCAGATGGGCG<br>Rev: ATCCGCTGTTGGGAATTGGT   | chr6: 6888470-6888600                     | Peak detected by ChIP-seq in <i>Dlx5/6</i> locus and confirmed by ChIP-qPCR, see Figure 3 |
| <i>Dlx5_12</i>     | Fwd: TAGCCTTGTGCGTTTGGACT<br>Rev: GGCAGCTCTCCACTGTCTTT   | chr6: 6833400-6834000                     | Peak detected by ChIP-seq in <i>Dlx5/6</i> locus and confirmed by ChIP-qPCR, see Figure 3 |
| <i>Dlx5_13</i>     | Fwd: GAGGAGGCCAGAAGAGGGTA<br>Rev: AGAGGACCTGGGGTGGATTC   | chr6: 6800200-6801000                     | Peak detected by ChIP-seq in <i>Dlx5/6</i> locus and confirmed by ChIP-qPCR, see Figure 3 |

TSS, transcription start site.

## References

- Barron, F., Woods, C., Kuhn, K., Bishop, J., Howard, M. J. and Clouthier, D. E.** (2011). Downregulation of *Dlx5* and *Dlx6* expression by *Hand2* is essential for initiation of tongue morphogenesis. *Development* **138**, 2249-2259.
- Charite, J., McFadden, D. G., Merlo, G., Levi, G., Clouthier, D. E., Yanagisawa, M., Richardson, J. A. and Olson, E. N.** (2001). Role of *Dlx6* in regulation of an endothelin-1-dependent, *dHAND* branchial arch enhancer. *Genes Dev* **15**, 3039-3049.
- Green, P. D., Hjalt, T. A., Kirk, D. E., Sutherland, L. B., Thomas, B. L., Sharpe, P. T., Snead, M. L., Murray, J. C., Russo, A. F. and Amendt, B. A.** (2001). Antagonistic regulation of *Dlx2* expression by *PITX2* and *Msx2*: implications for tooth development. *Gene Expr* **9**, 265-281.
- Hartmann, C.** (2009). Transcriptional networks controlling skeletal development. *Curr Opin Genet Dev* **19**, 437-443.
- Jeong, J., Li, X., McEvelly, R. J., Rosenfeld, M. G., Lufkin, T. and Rubenstein, J. L.** (2008). *Dlx* genes pattern mammalian jaw primordium by regulating both lower jaw-specific and upper jaw-specific genetic programs. *Development* **135**, 2905-2916.
- Jiang, Z., Pan, L., Chen, X., Chen, Z. and Xu, D.** (2017). *Wnt6* influences the viability of mouse embryonic palatal mesenchymal cells via the beta-catenin pathway. *Exp Ther Med* **14**, 5339-5344.
- Lefebvre, V. and Bhattaram, P.** (2010). Vertebrate skeletogenesis. *Curr Top Dev Biol* **90**, 291-317.
- Thomas, B. L., Liu, J. K., Rubenstein, J. L. and Sharpe, P. T.** (2000). Independent regulation of *Dlx2* expression in the epithelium and mesenchyme of the first branchial arch. *Development* **127**, 217-224.
- Verzi, M. P., Agarwal, P., Brown, C., McCulley, D. J., Schwarz, J. J. and Black, B. L.** (2007). The transcription factor *MEF2C* is required for craniofacial development. *Dev Cell* **12**, 645-652.
